# Liver Fat in the Metabolic Syndrome

Anna Kotronen, Jukka Westerbacka, Robert Bergholm, Kirsi H. Pietiläinen, and Hannele Yki-Järvinen

*Department of Medicine (A.K., J.W., R.B., K.H.P., H.Y.-J.), Division of Diabetes, The Finnish Twin Cohort Study, Department of Public Health (K.H.P.), and Obesity Research Unit (K.H.P.), Department of Psychiatry, University of Helsinki, FIN-00029 Helsinki, Finland; and Minerva Medical Research Institute (A.K., R.B.), 00290 Helsinki, Finland*

**Background:** The liver, once fatty, overproduces components of the metabolic syndrome, such as glucose and lipids. The amount of liver fat in subjects with and without the metabolic syndrome has not been determined. It is unknown which clinically available markers best reflect liver fat content.

**Measurements:** Components of the metabolic syndrome as defined by the International Diabetes Federation and liver fat content by proton magnetic resonance spectroscopy were measured in 271 nondiabetic subjects (162 women, 109 men). In addition, other features of insulin resistance (serum insulin, C-peptide), intraabdominal and sc fat by magnetic resonance imaging, and liver enzymes (serum alanine aminotransferase and serum aspartate aminotransferase) were measured.

**Results:** Liver fat was 4-fold higher in subjects with [ $n = 116$ ; median 8.2% (interquartile range 3.2–18.7%)] than without [ $n = 155$ ; 2.0%

(1.0–5.0%);  $P < 0.0001$ ] the metabolic syndrome. This increase in liver fat remained significant after adjusting for age, gender, and body mass index. All components of the metabolic syndrome correlated with liver fat content. The best correlate was waist in both women ( $r = 0.59$ ,  $P < 0.0001$ ) and men ( $r = 0.56$ ,  $P < 0.0001$ ). Liver fat correlated significantly with serum alanine aminotransferase ( $r = 0.39$ ,  $P < 0.0001$  for women;  $r = 0.44$ ,  $P < 0.0001$  for men) and aspartate aminotransferase ( $r = 0.27$ ,  $P = 0.0005$  for women;  $r = 0.31$ ,  $P = 0.0012$  for men) concentrations. The best correlates of liver fat were fasting serum insulin ( $r = 0.61$ ;  $P < 0.0001$  for both women and men) and C-peptide ( $r = 0.62$ ;  $P < 0.0001$  for both women and men).

**Conclusions:** Liver fat content is significantly increased in subjects with the metabolic syndrome as compared with those without the syndrome, independently of age, gender, and body mass index. Of other markers, serum C-peptide is the strongest correlate of liver fat. (*J Clin Endocrinol Metab* 92: 3490–3497, 2007)

THE METABOLIC SYNDROME represents a cluster of risk factors that is thought to increase the risk of cardiovascular diseases and type 2 diabetes more than the individual components [abdominal obesity, increased serum triglycerides, low high-density lipoprotein (HDL) cholesterol, hyperglycemia, and hypertension] (1). The pathophysiology of the metabolic syndrome is believed to include insulin resistance, but it is poorly understood why some but not others develop the syndrome.

Insulin normally inhibits the production of glucose and very low-density lipoprotein (VLDL) in the liver (2). Fat accumulation in the liver due to nonalcoholic causes (nonalcoholic fatty liver disease) is associated with insulin resistance (3). The inability of insulin to inhibit glucose and VLDL production results in overproduction of glucose (3, 4) and VLDL particles (5), leading to hypertriglyceridemia and low HDL cholesterol concentrations (5). The fatty liver also overproduces C-reactive protein (6) and plasminogen activator inhibitor-1 (7), which have been associated with the metabolic syndrome (8, 9). The prevalence of a fatty liver increases on the average as a function of obesity, but when subjects within a narrow range of body mass index (BMI) are studied,

the relationship is often independent of obesity (3, 10). Fat accumulation in the liver is known to cause insulin resistance in mouse models that have neither sc nor visceral fat (11) and is observed in insulin-resistant human subjects with lipodystrophy (12).

The above data would suggest that fat accumulation in the liver is a key player in the pathogenesis of insulin resistance and the metabolic syndrome and may distinguish subjects who develop the syndrome from those who do not, even independent of obesity. The amount of liver fat in subjects with and without the metabolic syndrome has not, however, been determined, although several studies have reported various components of the metabolic syndrome to correlate with liver fat measured either by proton spectroscopy (3, 10, 13, 14), ultrasound (15), the liver to spleen attenuation ratio by computed tomography (16), or liver enzymes (17). In the present study, we quantified liver fat in 271 nondiabetic subjects with and without the metabolic syndrome and examined how liver fat is related to individual components of the syndrome. Because liver fat predicts, independent of obesity, both cardiovascular disease (18) and type 2 diabetes (2), we also examined the relationship between liver fat and some other markers that can be measured in clinical practice.

## Subjects and Methods

### Subjects

A total of 271 nondiabetic subjects were recruited primarily by newspaper advertisements and contacting occupational health services using the following inclusion criteria: age 20–65 yr and no known acute or chronic disease based on history and physical examination and standard laboratory tests (blood counts, serum creatinine, TSH, electrolyte concentrations, and electrocardiogram). Exclusion criteria included preg-

First Published Online June 26, 2007

Abbreviations: ALT, Alanine aminotransferase; AST, aspartate aminotransferase; BMI, body mass index; FFA, free fatty acid; HbA<sub>1c</sub>, hemoglobin A<sub>1c</sub>; HDL, high-density lipoprotein; L/S ratio, liver to spleen attenuation ratio; MRI, magnetic resonance imaging; VLDL, very low-density lipoprotein.

JCEM is published monthly by The Endocrine Society (<http://www.endo-society.org>), the foremost professional society serving the endocrine community.

nancy and clinical or biochemical evidence of any significant disease other than obesity. Elevated liver enzymes [serum (S) alanine aminotransferase (ALT), aspartate aminotransferase (AST) and  $\gamma$ -glutamyl transferase] were not exclusion criteria. However, subjects with serologic evidence of hepatitis B or C, autoimmune hepatitis, clinical signs or symptoms of inborn errors of metabolism, or a history of use of toxins or drugs associated with liver steatosis were excluded, as were subjects consuming more than 20 g of alcohol per day. A total of 20 subjects were receiving medications for hypertension (Ca-channel blockers or angiotensin-converting enzyme inhibitors), six subjects were receiving medications for dyslipidemia (statins), and seven subjects were receiving medications for both hypertension and dyslipidemia. Nineteen percent of the women were postmenopausal. If eligible, the subjects were studied after an overnight fast to assess body composition and features of insulin resistance, as detailed below. All except 75 subjects have previously participated in metabolic studies (3, 10, 13, 19). All protocols were approved by the Ethics Committee of the Helsinki University Central Hospital, and each subject provided written informed consent.

### Diagnosis of the metabolic syndrome

The metabolic syndrome was defined according to criteria of the International Diabetes Federation: central obesity (waist circumference  $\geq 94$  cm in men and  $\geq 80$  cm in women) and at least two of the following factors: 1) serum triglycerides 1.70 mmol/liter or greater or specific treatment for this lipid abnormality; 2) serum HDL cholesterol less than 1.03 mmol/liter in men and less than 1.29 mmol/liter in women or specific treatment for this lipid abnormality; 3) systolic blood pressure 130 mm Hg or greater or diastolic blood pressure 85 mm Hg or greater or treatment for previously diagnosed hypertension; 4) fasting plasma glucose 5.6 mmol/liter or greater or previously diagnosed type 2 diabetes.

### Liver fat content (proton spectroscopy)

Localized single voxel ( $2 \times 2 \times 2$  cm<sup>3</sup>) proton spectra were acquired using a 1.5-T whole-body system (Magnetom Vision; Siemens, Erlangen, Germany), which consisted of a combination of whole-body and loop surface coils for radiofrequency transmitting and signal receiving. T1-weighted high-resolution magnetic resonance imaging (MRI) scans were used for localization of the voxel of interest within the right lobe of the liver. Magnetic resonance spectroscopy measurements of the liver fat were performed in the middle of the right lobe of the liver at a location that was individually determined for each subject; vascular structures and sc fat tissue were avoided when selecting the voxel. Subjects lay on their stomachs on the surface coil, which was embedded in a mattress to minimize abdominal movement due to breathing. The single voxel spectra were recorded using the stimulated-echo acquisition mode sequence, with an echo time of 20 msec, a repetition time of 3000 msec, a mixing time of 30 msec, 1024 data points over 1000 kHz spectral width with 32 averages. Water-suppressed spectra with 128 averages were also recorded to detect weak lipid signals. A short echo time and long repetition time was chosen to ensure a fully relaxed water signal, which was used as an internal standard. Chemical shifts were measured relative to water at 4.80 ppm. The methylene signal, which represents intracellular triglyceride, was measured at 1.4 ppm. Signal intensities were quantified by using an analysis program, VAPRO-MRUI (<http://www.mrui.uab.es/mrui/>). Spectroscopic intracellular triglyceride content (liver fat) was expressed as a ratio of the area under the methylene peak to that under the methylene and water peaks ( $\times 100$  = liver fat percent). This measurement has been validated against histologically determined lipid content (20) and against estimates of fatty degeneration or infiltration by x-ray computer-assisted tomography by us (4) and others (21). All spectra were analyzed by physicists who were unaware of any of the clinical data. The reproducibility of repeated measurements of liver fat in nondiabetic subjects studied on two occasions in our laboratory is 11% (22).

### Intraabdominal fat and sc fat (MRI)

In 128 of the 162 women and 93 of the 109 men, a series 16 of T1-weighted transaxial scans were acquired from a region extending from 8 cm above to 8 cm below the fourth and fifth lumbar interspace (16 slices, field of view  $375 \times 500$  mm<sup>2</sup>, slice thickness 10 mm, breath-hold repetition time 138.9 msec, echo time 4.1 msec). Intraabdominal and

sc fat areas were measured using an image analysis program (Alice 3.0; Parexel, Waltham, MA). A histogram of pixel intensity in the intraabdominal region was displayed, and the intensity corresponding to the nadir between the lean and fat peaks was used as a cutoff point. Intraabdominal adipose tissue was defined as the area of pixels in the intraabdominal region above this cutoff point. For calculation of sc adipose tissue area, a region of interest was first manually drawn at the demarcation of sc adipose tissue and intraabdominal adipose tissue, as previously described (4).

### Other measurements

In 148 women and 97 men, the percent body fat was determined using bioelectrical impedance analysis (bioelectrical impedance analyzer system, model number BIA-101A; RJL Systems, Detroit, MI) (21). Waist circumference was measured midway between spina iliaca superior and the lower rib margin and hip circumference at the level of the greater trochanters (23). Body weight was recorded to the nearest 0.1 kg using a calibrated weighting scale (Soehnle, Monilaite-Dayton, Finland) with subjects barefoot and wearing light indoor clothing. Body height was recorded to the nearest 0.5 cm using a ruler attached to the scale. Blood pressure was measured in the sitting position after 10–15 min of rest using a random-zero sphygmomanometer (Erka, Chemnitz, Germany). Blood samples were taken after an overnight fast for measurement of fasting plasma glucose, fasting serum insulin, and C-peptide, hemoglobin A<sub>1c</sub> (HbA<sub>1c</sub>), liver enzymes, serum triglycerides, and total and HDL cholesterol concentrations.

### Analytical procedures

Plasma glucose concentrations were measured in duplicate using the glucose oxidase method using Glucose Analyzer II (Beckman Instruments, Fullerton, CA) (24). Serum-free insulin concentrations were measured with the Auto-DELFIA kit (Wallac, Turku, Finland), and C-peptide concentrations by RIA (25). HbA<sub>1c</sub> was measured by HPLC using the fully automated glycosylated hemoglobin analyzer system (Bio-Rad, Richmond, CA) (26). Serum total cholesterol, HDL cholesterol, and triglyceride concentrations were measured with the enzymatic kits from Roche Diagnostics using an autoanalyzer (Roche Diagnostics Hitachi, Hitachi Ltd., Tokyo, Japan). The concentrations of low-density lipoprotein cholesterol were calculated using the Friedewald formula (27). Serum ALT and serum AST activities were determined as recommended by the European Committee for Clinical Laboratory Standards. Serum free fatty acid (FFA) concentrations were measured using a fluorometric method (28).

### Statistical analyses

Nonnormally distributed data were used after logarithmic (base 10) transformation. If distributed normally, data are shown as means  $\pm$  SD, whereas nonnormally distributed data are shown as median (25% percentile, 75% percentile). The unpaired Student's *t* test was used to compare mean values between men and women. Analysis of covariance was used to compare slopes and intercepts of regression lines for men and women. If neither the slopes nor intercepts differed between women and men, a common regression equation was calculated for all data. Analysis of covariance was used to adjust for age, gender, and BMI.

Calculations were made using GraphPad Prism (version 4.00 for Windows; GraphPad Software, San Diego, CA), SysStat Statistical Package (version 10; SysStat, Evanston, IL), and SPSS (version 11.0 for Windows; SPSS, Chicago, IL). *P* < 0.05 was considered statistically significant.

## Results

### Characteristics of the women and men (Table 1)

The women and men were similar with respect to age and absolute body weight. Women had higher BMI, waist circumference, waist to hip ratio, and percent total body and sc fat volume than men, but intraabdominal and liver fat was similar in both groups. If adjusted for age and BMI, women had significantly lower liver fat (*P* = 0.001) and intraab-

**TABLE 1.** Basic characteristics

|                                       | Women            | Men              | <i>P</i> value |
|---------------------------------------|------------------|------------------|----------------|
| n                                     | 162              | 109              |                |
| Age (yr)                              | 38 ± 12          | 37 ± 11          | NS             |
| Body composition                      |                  |                  |                |
| Weight (kg)                           | 86.0 ± 6.4       | 86.1 ± 6.7       | NS             |
| BMI (kg/m <sup>2</sup> )              | 31.4 ± 6.8       | 26.9 ± 4.9       | 0.0001         |
| Waist (cm)                            | 101 ± 16         | 96 ± 14          | 0.02           |
| Hip (cm)                              | 109 ± 11         | 100 ± 9          | 0.0001         |
| Waist to hip ratio                    | 0.91 ± 0.08      | 0.96 ± 0.08      | 0.0001         |
| Whole-body fat (%)                    | 33.3 ± 6.3       | 20.5 ± 6.2       | 0.0001         |
| Abdominal sc fat (cm <sup>3</sup> )   | 5120 ± 2100      | 2660 ± 1300      | 0.0001         |
| Intraabdominal fat (cm <sup>3</sup> ) | 1060 (560–1600)  | 1170 (660–1850)  | NS             |
| Liver fat (%)                         | 4.0 (1.0–10.0)   | 3.0 (1.0–13.0)   | NS             |
| Lipids                                |                  |                  |                |
| fS-triglycerides (mmol/liter)         | 1.26 (0.87–1.71) | 1.10 (0.9–1.71)  | NS             |
| fS-HDL cholesterol (mmol/liter)       | 1.40 (1.17–1.71) | 1.25 (1.10–1.57) | 0.0063         |
| fS-LDL cholesterol (mmol/liter)       | 2.99 ± 0.83      | 3.06 ± 0.94      | NS             |
| fS-FFA (μmol/liter)                   | 682 ± 195        | 593 ± 215        | 0.001          |
| Blood pressure                        |                  |                  |                |
| Systolic (mm Hg)                      | 126 ± 17         | 130 ± 13         | 0.010          |
| Diastolic (mm Hg)                     | 78 ± 11          | 82 ± 10          | 0.005          |
| Other parameters                      |                  |                  |                |
| fP-glucose (mmol/liter)               | 5.4 ± 0.6        | 5.5 ± 0.4        | NS             |
| fS-insulin (mU/liter)                 | 7.6 (4.9–12.3)   | 7.0 (4.5–10.0)   | NS             |
| fS-C-peptide (nmol/liter)             | 0.82 (0.6–1.0)   | 0.67 (0.4–1.0)   | NS             |
| HbA <sub>1c</sub> (%)                 | 5.5 ± 0.6        | 5.5 ± 0.4        | NS             |
| S-AST (U/liter) <sup>a</sup>          | 25 (20–32)       | 30 (23–40)       | 0.0007         |
| S-ALT (U/liter) <sup>b</sup>          | 24 (18–40)       | 35 (21–57)       | 0.0001         |

Data are shown as mean ± SD or median (25% percentile, 75% percentile). Abdominal sc and intraabdominal fat volumes were determined in 128 women and 93 men. Whole-body fat was measured in 148 women and 97 men. LDL, Low-density lipoprotein; S, serum; fP, fasting plasma; fS, fasting serum; NS, not significant.

<sup>a</sup> Reference values: 10–45 U/liter for women; 10–70 U/liter for men.

<sup>b</sup> Reference values: 15–35 U/liter for women; 15–45 U/liter for men.

dominal fat content ( $P = 0.001$ ) than men. Despite greater obesity in women, both women and men had similar concentrations of fasting plasma glucose, HbA<sub>1c</sub>, fasting serum insulin, C-peptide, and serum triglycerides. Blood pressure and serum ALT and AST concentrations were significantly higher in men compared with those in women.

#### Characteristics of subjects with and without the metabolic syndrome (Figs. 1–3 and Table 2)

**Liver fat content.** A total of 116 subjects (43%) met the criteria for the metabolic syndrome. Individuals with the metabolic syndrome had significantly higher liver fat content (median 8.2%; interquartile range 3.2–18.7%), compared with those without the metabolic syndrome (2.0%; 1.0–5.0%,  $P < 0.0001$ ). This difference remained significant after adjustment for age, gender, and BMI ( $P = 0.011$ ). In subjects with the metabolic syndrome, liver fat averaged 6.3% (2.0–17.0%) in individuals with any two components of the metabolic syndrome, 8.2% (4.8–22.0%) in individuals with any three components, and 15.5% (7.0–23.2%) in individuals with all four components ( $P$  for trend  $< 0.0001$ ).

The regression lines representing the relationships between liver fat and components of the metabolic syndrome are depicted in Fig. 1. The regression lines relating liver fat to components of the metabolic syndrome were not significantly different between subjects with and without the metabolic syndrome (data not shown). A total of 108 subjects (68 women, 40 men) had increased liver fat content ( $>5.56\%$ ) (29), and 73 (68%) of them met criteria for the metabolic

syndrome (52 women, 21 men). Inclusion or exclusion of the subjects using antihypertensives or lipid lowering drugs (a total of 33 subjects) did not alter the results (data not shown).

**Body composition.** Figure 2 depicts the relationships between liver fat and BMI, whole body fat percent, and intraabdominal fat measured by MRI. Women had less liver fat for the same BMI and whole body fat percent than men, whereas the relationship between liver fat and intraabdominal fat were similar in both women and men. Liver fat content was better correlated with intraabdominal than abdominal sc fat in both women and men. Both intraabdominal and sc fat volumes were significantly higher in subjects with than without the metabolic syndrome independent of age, gender, and BMI.

**Other features.** As shown in Table 2, after adjustment for age, gender, and BMI, subjects with the metabolic syndrome differed from those without the syndrome with respect to all components of the syndrome. Subjects with the metabolic syndrome also had significantly higher fasting serum insulin and C-peptide concentrations than those without the syndrome independent of age, gender, and BMI. Indeed, of all parameters analyzed, fasting serum insulin and C-peptide concentrations were the strongest correlates of liver fat content ( $r = 0.61$ ;  $P < 0.0001$  and  $r = 0.62$ ;  $P < 0.0001$ , respectively). After adjustment for age, gender and BMI, these associations remained extremely significant [fasting serum (fS)-insulin:  $r = 0.39$ ,  $P < 0.0001$ ; C-peptide:  $r = 0.36$ ;  $P < 0.0001$ ]. The relationships could be characterized by a single

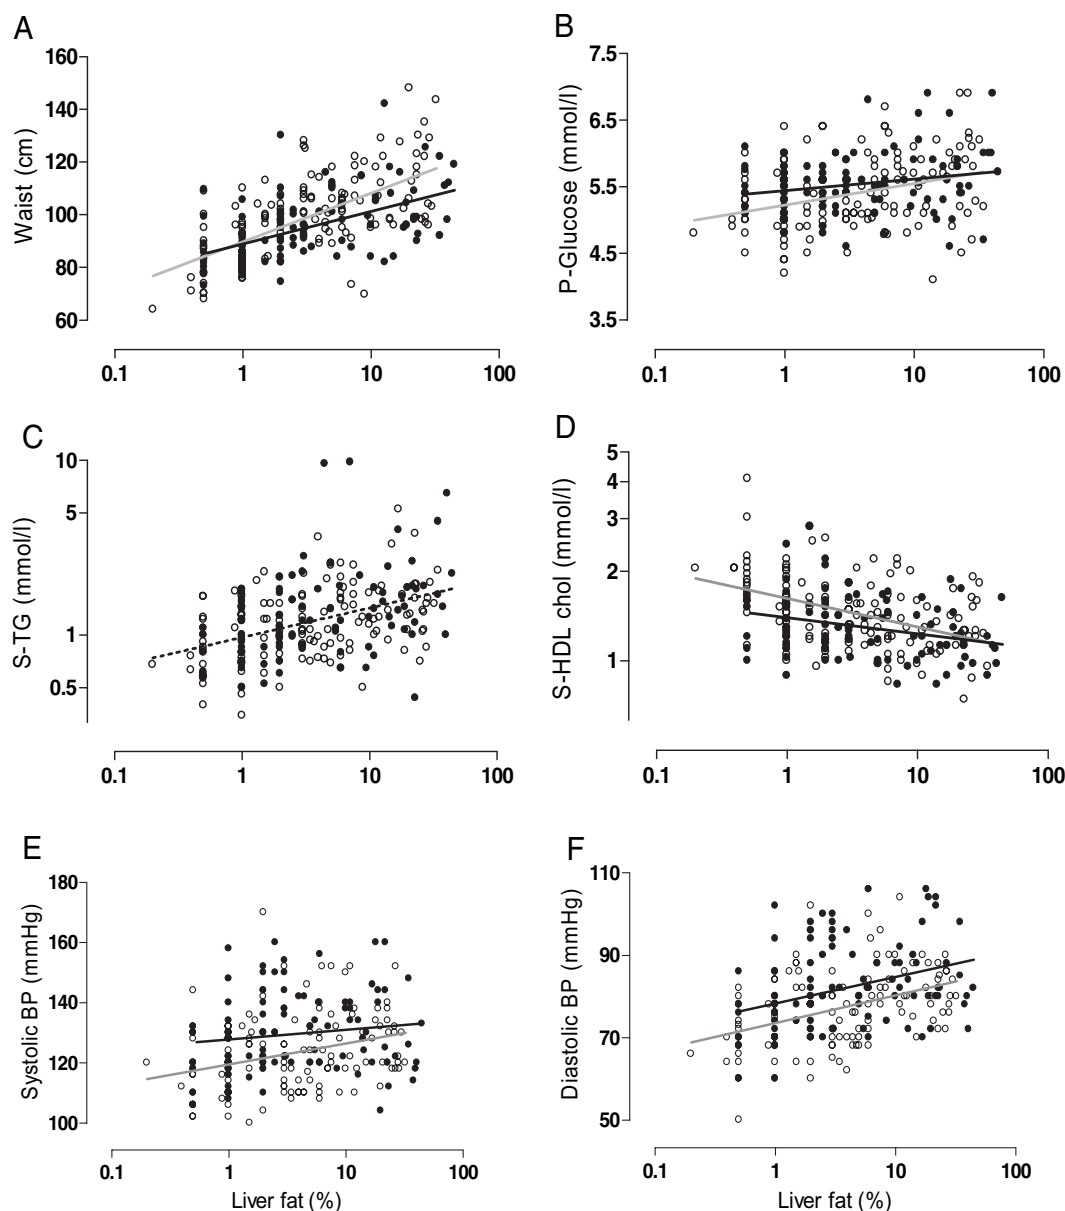

FIG. 1. Relationships between liver fat and components of the metabolic syndrome. Liver fat is associated with waist circumference [ $r = 0.59$ ,  $P < 0.0001$  ( $r = 0.12$ , NS) for women;  $r = 0.56$ ,  $P < 0.0001$  ( $r = 0.26$ ,  $P = 0.008$ ) for men], fasting plasma (P) glucose [ $r = 0.32$ ,  $P < 0.0002$  ( $r = 0.18$ ,  $P = 0.041$ ) for women;  $r = 0.22$ ,  $P = 0.026$  ( $r = 0.053$ , NS) for men], serum (S) triglycerides [ $r = 0.40$ ,  $P < 0.0001$  ( $r = 0.14$ , NS) for women;  $r = 0.44$ ,  $P < 0.0001$  ( $r = 0.24$ ,  $P = 0.016$ ) for men;  $r = 0.42$ ,  $P < 0.0001$  ( $r = 0.19$ ,  $P = 0.003$ ) for both women and men], HDL cholesterol [ $r = -0.44$ ,  $P < 0.0001$  ( $r = -0.24$ ,  $P = 0.005$ ) for women;  $r = -0.31$ ,  $P = 0.002$  ( $r = -0.22$ ,  $P = 0.029$ ) for men], systolic blood pressure [ $r = 0.30$ ,  $P = 0.0004$  ( $r = 0.08$ , NS) for women;  $r = 0.14$ , NS ( $r = -0.03$ , NS) for men], and diastolic blood pressure [ $r = 0.42$ ,  $P < 0.0001$  ( $r = 0.20$ ,  $P = 0.020$ ) for women;  $r = 0.31$ ,  $P = 0.0006$  ( $r = 0.15$ , NS) for men]. Correlation coefficients and their significances adjusted for age and BMI are given in parentheses. Subjects who were receiving medications for hypertension ( $n = 20$ ), dyslipidemia ( $n = 6$ ), or both hypertension and dyslipidemia ( $n = 7$ ) were excluded from these analyses. Open circles ( $\circ$ ) and gray lines denote women ( $n = 134$ ), filled circles ( $\bullet$ ) and black lines denote men ( $n = 104$ ), and dashed line denotes both women and men.

regression line because neither the slopes nor the intercepts differed between men and women (Fig. 3).

#### The relationship between liver fat content and liver enzymes

Serum ALT and AST concentrations were positively correlated with liver fat in both women and men (Fig. 3). There was no difference between the slopes of the regression lines relating liver fat to ALT and AST in the two groups, but the y-intercepts were significantly lower in women than men.

This difference averaged  $7.3 \pm 1.1$  U/liter for serum ALT and  $3.9 \pm 1.0$  U/liter for serum AST. After adjusting for age and BMI, liver fat retained its associations with both serum ALT ( $r = 0.32$ ,  $P < 0.0001$  for women;  $r = 0.38$ ,  $P < 0.0001$  for men) and AST ( $r = 0.31$ ,  $P < 0.0001$  for women;  $r = 0.28$ ,  $P = 0.003$  for men) concentrations.

Serum ALT concentrations were elevated in 30 women (19%) and 21 men (19%), in whom liver fat averaged  $14 \pm 12$  and  $18 \pm 15\%$ , respectively (NS). Among the individuals



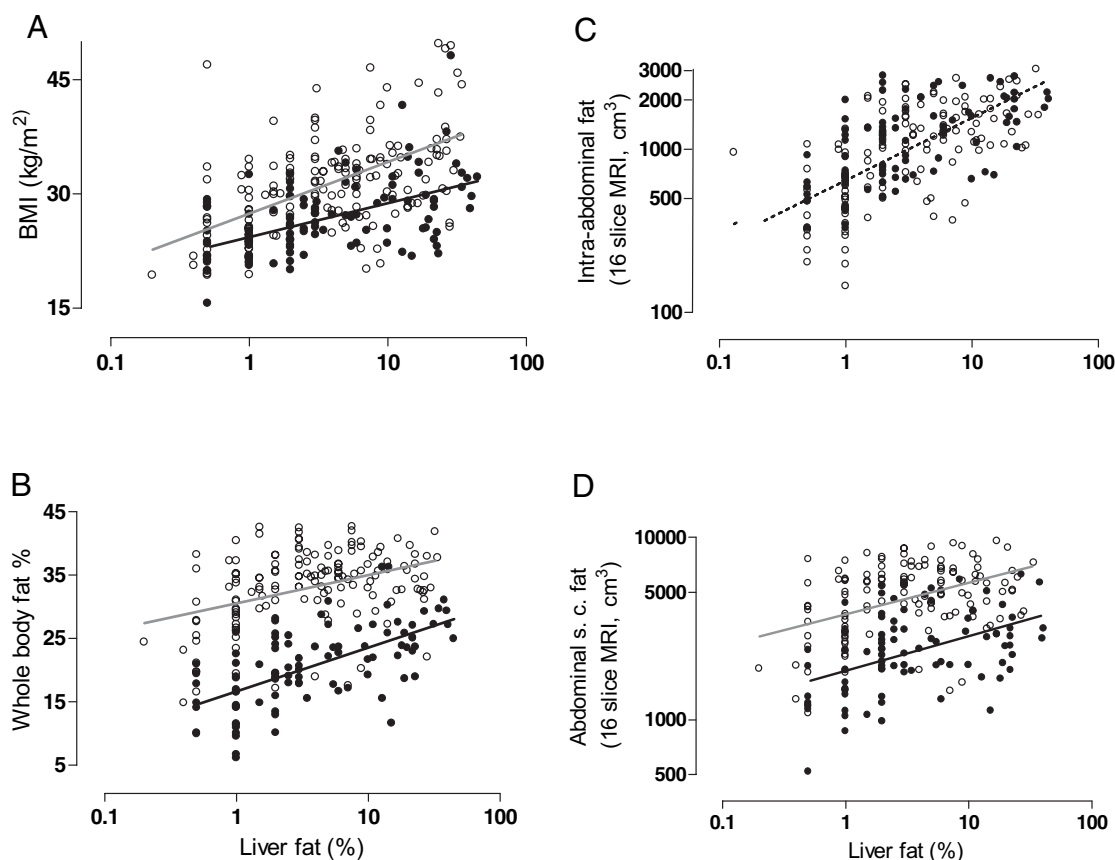

FIG. 2. The relationships between liver fat and body composition features. Liver fat is associated with BMI [ $r = 0.54$ ,  $P < 0.0001$  for women ( $n = 161$ );  $r = 0.52$ ,  $P < 0.0001$  for men ( $n = 107$ )] (A), percent body fat [ $r = 0.39$ ,  $P < 0.0001$  for women ( $n = 148$ );  $r = 0.62$ ,  $P < 0.0001$  for men ( $n = 97$ )] (B), intraabdominal fat [ $r = 0.64$ ,  $P < 0.0001$  for both women ( $n = 128$ ) and men ( $n = 93$ )] (C), and abdominal sc fat [ $r = 0.43$ ,  $P < 0.0001$  for women ( $n = 128$ );  $r = 0.45$ ,  $P < 0.0001$  for men ( $n = 93$ )] (D). Symbols as in Fig. 1.

with elevated serum ALT, 23 (46%) met the criteria for the metabolic syndrome (13 women, 10 men). Serum AST concentrations appeared to be elevated in 34 women (21%) and 23 men (21%), in whom liver fat averaged  $14 \pm 11$  and  $16 \pm 13\%$ , respectively (NS). Among the individuals with elevated serum AST, 26 subjects (39%) were diagnosed with the syndrome (18 women, nine men).

### Discussion

To our knowledge, this is the first study to quantitate the amount of liver fat in subjects with and without the metabolic syndrome. Liver fat content, measured by the most accurate method available to date (2), was 4-fold higher in subjects with than without the metabolic syndrome independent of age, gender, and BMI. Liver fat content increased in proportion to the number of components of the metabolic syndrome. Each component of the syndrome correlated with liver fat content. Of all measures of insulin resistance, the best correlates of liver fat were fasting serum insulin and C-peptide concentrations.

The study population did not represent a random sample but rather represented a nondiabetic group that had been recruited for metabolic studies using similar criteria: 1) age 20–65 yr; 2) good health except for possible obesity; 3) no known acute or chronic disease except for hypertension and

hyperlipidemia based on history and physical examination and standard laboratory tests; and 4) alcohol consumption less than 20 g/d. In subjects without the metabolic syndrome, liver fat content averaged 2.0% (1.0–5.0%), which corresponds closely to what was considered normal in the Dallas Heart Study (29). In this population-based study, in which liver fat was measured in 2349 subjects using proton magnetic resonance spectroscopy, the upper limit of normal liver fat was 5.56%. In patients with the metabolic syndrome in the present study, median liver fat content exceeded this limit and averaged 8.2%. The increase could not be explained by age or gender, and it was independent of BMI. This is in agreement with previous studies in which the relationship between liver fat and obesity has been weak (5) and nonexistent (3, 10) if subjects with a narrow range of BMI have been studied.

Here we show that liver fat content correlated with all components of the metabolic syndrome as defined by the newest International Diabetes Federation criteria. The best correlate was waist circumference, which could explain 31–35% of the variation in liver fat content. Waist is thought to be a surrogate for intraabdominal fat, and when measured directly using MRI, intraabdominal fat volume explained 38–44% of the variation in liver fat content. In the study of Kelley *et al.* (16), which included 83 type 2 diabetic patients

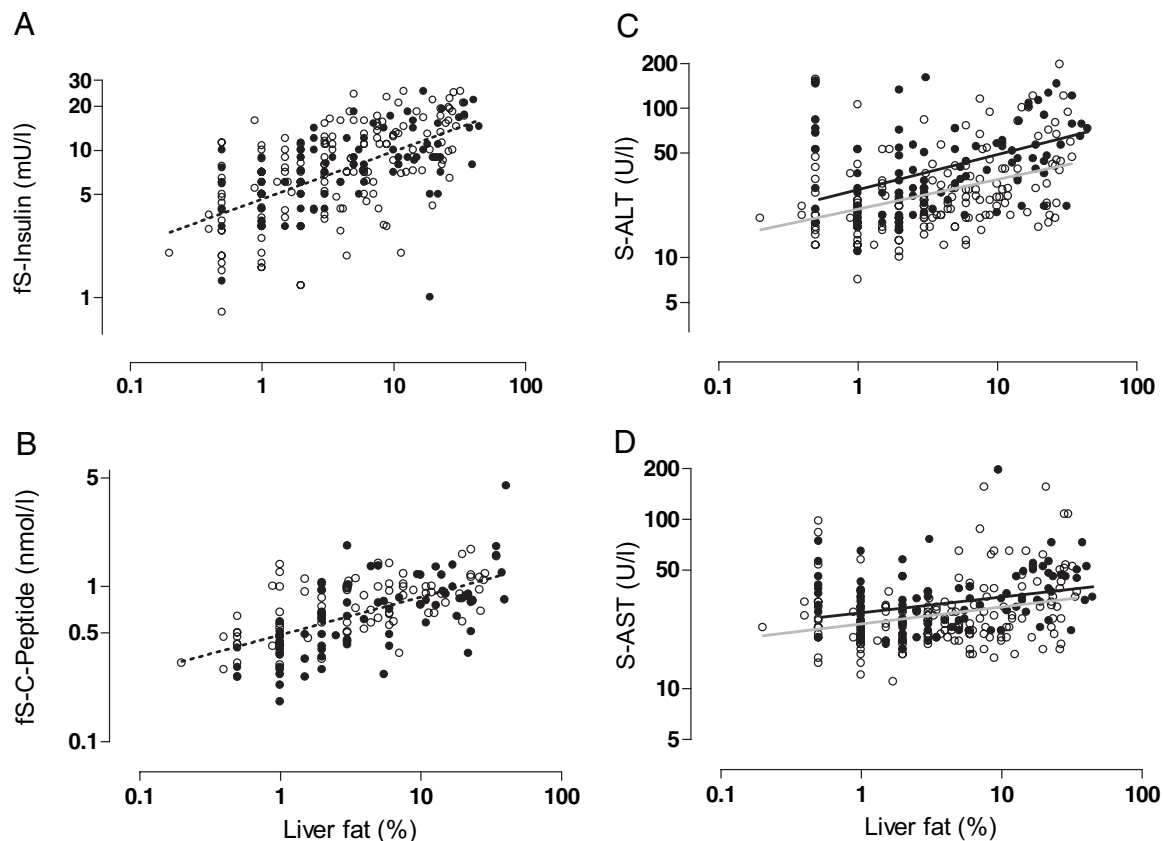

FIG. 3. The relationships between liver fat and fS-insulin, fS-C-peptide, and liver enzymes. Liver fat is associated with fS-insulin [ $r = 0.61$ ,  $P < 0.0001$  ( $r = 0.39$ ,  $P < 0.0001$  for both men ( $n = 89$ ) and women ( $n = 162$ ))] (A) and fS-C-peptide [ $r = 0.62$ ,  $P < 0.0001$  ( $r = 0.36$ ,  $P < 0.0001$  for both men ( $n = 76$ ) and women ( $n = 109$ ))] (B) and serum (S) ALT [ $r = 0.39$ ,  $P < 0.0001$  for women ( $n = 162$ );  $r = 0.44$ ,  $P < 0.0001$  for men ( $n = 109$ )] (C) and S-AST [ $r = 0.27$ ,  $P = 0.0005$  for women ( $n = 162$ );  $r = 0.31$ ,  $P = 0.0012$  for men ( $n = 109$ )] (D) concentrations. Correlation coefficients and their significances adjusted for age and BMI are given in parentheses. Symbols as in Fig. 1.

and 27 nondiabetic subjects, visceral adipose tissue and the liver to spleen attenuation ratio (L/S ratio) were significantly correlated ( $r = 0.57$ ), *i.e.* visceral adipose tissue explained 32% of the variation in the L/S ratio, which is a qualitative rather than quantitative marker of liver fat. Consistent with the data of Kelley *et al.* (16) in type 2 diabetic patients, in which BMI explained 18% of variation in the L/S ratio, we found BMI to explain 29 and 27% of the variation of liver fat in women and men, respectively. Taken together, these data suggest that visceral adipose tissue, although possibly important, is not the only factor contributing to the variation in liver fat content. Indeed, according to catheterization studies, the contribution of visceral fat to hepatic FFA delivery averaged 10% and did not exceed 50% of the total amount of FFA reaching the liver (30).

Liver fat was significantly positively correlated with serum triglycerides and similarly negatively correlated with HDL cholesterol. This has previously been documented in smaller studies (13, 14). The increase in serum triglycerides is known mainly to reflect insulin resistance or inhibition of hepatic VLDL production (5). High triglycerides in turn lower HDL cholesterol (31). In addition, linear regression analysis revealed a weak but significant association between liver fat content and both systolic and diastolic blood pressure. The poor correlation may be due to use of a single measurement of blood pressure, which is neither reliable nor

reproducible (32). In keeping with this, in a previous study both 24-h systolic and diastolic blood pressures were elevated in women with high compared with those with low liver fat content independently of age and BMI (10).

Liver enzyme concentrations have previously been shown to reflect hepatic steatosis (17, 33). Although we found a significant correlation between liver fat and both serum ALT and AST concentrations, other markers, such as fasting serum C-peptide, more accurately reflected liver fat content in these nondiabetic subjects. Serum ALT concentrations explained only 15–19% of liver fat, implying that this enzyme is a poor marker of liver fat. There were no differences in the slopes of the regression lines relating liver fat and liver enzymes between women and men, but the intercepts differed significantly. This observation is consistent with the lower reference ranges for serum ALT and AST in women, compared with those in men (34). Smaller liver size (35) and decrease in serum ALT by female reproductive hormones (36, 37) could contribute to lower serum ALT concentrations in women than in men.

Of all parameters analyzed, fasting serum insulin was the marker most closely related to liver fat content. This strong association may be explained by the decrease in hepatic insulin clearance in subjects with increased hepatic fat content (38, 39). Indeed, a 51% decrease in liver fat achieved by rosiglitazone therapy has been shown to increase insulin

**TABLE 2.** Characteristics of subjects with and without the metabolic syndrome

|                                       | MS–              | MS–              | MS+               | MS+              | Unadjusted<br><i>P</i> value<br>(MS – <i>vs.</i> MS +) | <i>P</i> value adjusted for<br>age, gender, and BMI<br>(MS – <i>vs.</i> MS +) |
|---------------------------------------|------------------|------------------|-------------------|------------------|--------------------------------------------------------|-------------------------------------------------------------------------------|
| Gender                                | Women            | Men              | Women             | Men              |                                                        |                                                                               |
| n                                     | 82               | 73               | 80                | 36               |                                                        |                                                                               |
| Age (yr)                              | 34 ± 11          | 36 ± 10          | 43 ± 11           | 38 ± 13          | 0.0001                                                 |                                                                               |
| Body composition                      |                  |                  |                   |                  |                                                        |                                                                               |
| Weight (kg)                           | 78.8 (65.1–89.3) | 76.9 (70.6–85.1) | 91.9 (82.6–101.2) | 100 (89.0–108)   | 0.0001                                                 | NS                                                                            |
| BMI (kg/m <sup>2</sup> )              | 28.7 ± 6.5       | 24.8 ± 3.5       | 34.1 ± 6.1        | 31.0 ± 4.5       | 0.0001                                                 |                                                                               |
| Waist (cm)                            | 94 ± 15          | 90 ± 10          | 108 ± 13          | 109 ± 11         | 0.0001                                                 | 0.0001                                                                        |
| Hip (cm)                              | 106 ± 11         | 96 ± 8           | 113 ± 10          | 105 ± 7          | 0.0001                                                 | NS                                                                            |
| Waist to hip ratio                    | 0.89 ± 0.08      | 0.93 ± 0.06      | 0.95 ± 0.07       | 1.02 ± 0.06      | 0.0001                                                 | NS                                                                            |
| Whole-body fat (%)                    | 32.2 (26.4–36.0) | 18.7 (14.3–21.4) | 36.5 (34.7–38.2)  | 25.6 (22.6–27.3) | 0.0001                                                 | NS                                                                            |
| Intraabdominal fat (cm <sup>3</sup> ) | 671 (390–1140)   | 830 (620–1330)   | 1510 (1130–1970)  | 2030 (1370–2670) | 0.0001                                                 | 0.011                                                                         |
| Liver fat (%)                         | 1.6 (1.0–4.5)    | 2.0 (1.0–6.0)    | 7.9 (4.0–19)      | 9.3 (2.5–19)     | 0.0001                                                 | 0.011                                                                         |
| Lipids                                |                  |                  |                   |                  |                                                        |                                                                               |
| S-triglycerides (mmol/liter)          | 0.94 (0.70–1.27) | 1.00 (0.80–1.20) | 1.97 (1.24–2.10)  | 1.90 (1.40–2.55) | 0.0001                                                 | 0.0001                                                                        |
| S-HDL cholesterol (mmol/liter)        | 1.58 (1.36–1.99) | 1.37 (1.18–1.60) | 1.21 (1.08–1.47)  | 1.11 (0.99–1.34) | 0.0001                                                 | 0.0001                                                                        |
| S-LDL cholesterol (mmol/liter)        | 2.69 ± 0.87      | 3.05 ± 0.94      | 3.1 ± 0.73        | 3.0 ± 0.95       | 0.0001                                                 | 0.0001                                                                        |
| S-FFA (μmol/liter)                    | 653 ± 196        | 580 ± 206        | 713 ± 189         | 626 ± 231        | 0.02                                                   | NS                                                                            |
| Blood pressure                        |                  |                  |                   |                  |                                                        |                                                                               |
| Systolic (mm Hg)                      | 120 ± 12         | 127 ± 13         | 132 ± 20          | 136 ± 13         | 0.0001                                                 | 0.0001                                                                        |
| Diastolic (mm Hg)                     | 74 ± 8           | 81 ± 11          | 82 ± 12           | 85 ± 10          | 0.0001                                                 | 0.025                                                                         |
| Other parameters                      |                  |                  |                   |                  |                                                        |                                                                               |
| fP-glucose (mmol/liter)               | 5.1 ± 0.4        | 5.3 ± 0.3        | 5.8 ± 0.5         | 5.8 ± 0.5        | 0.0001                                                 | 0.004                                                                         |
| fS-insulin (mU/liter)                 | 5.8 (3.0–9.0)    | 6.0 (4.0–9.0)    | 11 (7.0–16)       | 10 (8.0–14)      | 0.0001                                                 | 0.0001                                                                        |
| fS-C-peptide (nmol/liter)             | 0.60 (0.43–0.92) | 0.51 (0.38–0.83) | 0.93 (0.72–1.09)  | 0.97 (0.68–1.36) | 0.0001                                                 | 0.0001                                                                        |
| HbA <sub>1c</sub> (%)                 | 5.3 ± 0.4        | 5.4 ± 0.4        | 5.6 ± 0.8         | 5.5 ± 0.4        | 0.0001                                                 | NS                                                                            |
| S-ALT (U/liter)                       | 22 (16–36)       | 27 (22–39)       | 26 (19–46)        | 54 (32–73)       | 0.0006                                                 | NS                                                                            |
| S-AST (U/liter)                       | 26 (21–32)       | 29 (22–39)       | 24 (20–35)        | 34 (26–46)       | NS                                                     | NS                                                                            |

Data are shown as mean ± SD or median (25% percentile–75% percentile). Abdominal sc and intraabdominal fat volumes were determined in 98 subjects without and 83 subjects with the metabolic syndrome. The percent whole-body fat was measured in 99 subjects without and 85 subjects with the metabolic syndrome. MS, Metabolic syndrome; LDL, low-density lipoprotein; S, serum; fP, fasting plasma; fS, fasting serum; NS, nonsignificant.

clearance by 20% (40). However, C-peptide, which is not degraded by the liver (41), was also a strong correlate of liver fat. This documents that the increase in serum insulin is not just a consequence of diminished insulin clearance. Previously, fasting serum insulin has been included in the definition of the metabolic syndrome (42), but because of assay standardization problems, this parameter was excluded from the latest metabolic syndrome criteria. Still, within a given laboratory, increased fasting serum insulin and C-peptide concentrations could be useful markers of the fatty liver independently of age, gender, and BMI.

In conclusion, we found liver fat to be on the average 4-fold increased in middle-aged nondiabetic subjects with the metabolic syndrome. Components of the syndrome were significantly correlated with liver fat, even independently of age, gender, and BMI. Although the interindividual variation in liver fat ranged considerably, the mean increase (8.2 *vs.* 2.0%) cannot be detected by routinely available clinical tools such as serum ALT. Nevertheless, the present data strengthen the idea that those obese and nonobese subjects who accumulate excess fat in the liver are the ones who develop the metabolic syndrome.

### Acknowledgments

We gratefully acknowledge Mia Urjansson, Katja Tuominen, Tuija Mård, Anna-Maija Häkkinen, Antti Hakkarainen, and Pentti Pölönen for excellent technical assistance; Satu Vehkavaara, Anja Cornér, Mirja Tiikkainen, Anneli Seppälä-Lindroos, Marjo Tamminen, Jussi Sutinen,

Jaakko Kaprio, and Aila Rissanen for their contributions; and the volunteers for their help.

Received March 1, 2007. Accepted June 15, 2007.

Address all correspondence and requests for reprints to: Hannele Yki-Järvinen, M.D., F.R.C.P., Department of Medicine, Division of Diabetes, University of Helsinki, Finland, P.O. Box 700, Room C426B, FIN-00029 HUCH, Helsinki, Finland. E-mail: ykijarvi@cc.helsinki.fi.

This work was supported by research grants from the Academy of Finland, the Academy of Finland Centre of Excellence in Complex Disease Genetics, the Sigrid Juselius Foundation, Novo Nordisk Foundation, and the Medical Society of Finland. This work is part of the project “Hepatic and adipose tissue and functions in the metabolic syndrome (www.hepadip.org), which is supported by the European Commission as an Integrated Project under the 6th Framework Programme (Contract LSHM-CT-2005-018734).

Disclosure Statement: The authors have nothing to disclose.

### References

- Alberti KG, Zimmet P, Shaw J, IDF Epidemiology Task Force Consensus Group 2005 The metabolic syndrome—a new worldwide definition. *Lancet* 366:1059–1062
- Yki-Järvinen H 2005 Fat in the liver and insulin resistance. *Ann Med* 37:347–356
- Seppälä-Lindroos A, Vehkavaara S, Hakkinen AM, Goto T, Westerbacka J, Sovijärvi A, Halavaara J, Yki-Järvinen H 2002 Fat accumulation in the liver is associated with defects in insulin suppression of glucose production and serum free fatty acids independent of obesity in normal men. *J Clin Endocrinol Metab* 87:3023–3028
- Ryysy L, Hakkinen AM, Goto T, Vehkavaara S, Westerbacka J, Halavaara J, Yki-Järvinen H 2000 Hepatic fat content and insulin action on free fatty acids and glucose metabolism rather than insulin absorption are associated with insulin requirements during insulin therapy in type 2 diabetic patients. *Diabetes* 49:749–758

5. Adiels M, Taskinen MR, Packard C, Caslake MJ, Soro-Paavonen A, Westerbacka J, Vehkavaara S, Hakkinen A, Olofsson SO, Yki-Jarvinen H, Boren J 2006 Overproduction of large VLDL particles is driven by increased liver fat content in man. *Diabetologia* 49:755–765
6. Kerner A, Avizohar O, Sella R, Bartha P, Zinder O, Markiewicz W, Levy Y, Brook GJ, Aronson D 2005 Association between elevated liver enzymes and C-reactive protein: possible hepatic contribution to systemic inflammation in the metabolic syndrome. *Arterioscler Thromb Vasc Biol* 25:193–197
7. Yki-Jarvinen H, Sutinen J, Silveira A, Korshenninnikova E, Fisher RM, Kanisto K, Ehrenborg E, Eriksson P, Hamsten A 2003 Regulation of plasma PAI-1 concentrations in HAAART-associated lipodystrophy during rosiglitazone therapy. *Arterioscler Thromb Vasc Biol* 23:688–694
8. Ridker PM, Buring JE, Cook NR, Rifai N 2003 C-reactive protein, the metabolic syndrome, and risk of incident cardiovascular events: An 8-year follow-up of 14,719 initially healthy American women. *Circulation* 107:391–397
9. Mertens I, Verrijken A, Michiels JJ, Van der Planken M, Ruige JB, Van Gaal LF 2006 Among inflammation and coagulation markers, PAI-1 is a true component of the metabolic syndrome. *Int J Obes (Lond)* 30:1308–1314
10. Tiikkainen M, Tamminen M, Hakkinen AM, Bergholm R, Vehkavaara S, Halavaara J, Teramo K, Rissanen A, Yki-Jarvinen H 2002 Liver-fat accumulation and insulin resistance in obese women with previous gestational diabetes. *Obes Res* 10:859–867
11. Moitra J, Mason MM, Olive M, Krylov D, Gavrilo O, Marcus-Samuels B, Feigenbaum L, Lee E, Aoyama T, Eckhaus M, Reitman ML, Vinson C 1998 Life without white fat: a transgenic mouse. *Genes Dev* 12:3168–3181
12. Agarwal AK, Garg A 2003 Congenital generalized lipodystrophy: significance of triglyceride biosynthetic pathways. *Trends Endocrinol Metab* 14:214–221
13. Westerbacka J, Corner A, Tiikkainen M, Tamminen M, Vehkavaara S, Hakkinen AM, Fredriksson J, Yki-Jarvinen H 2004 Women and men have similar amounts of liver and intra-abdominal fat, despite more subcutaneous fat in women: implications for sex differences in markers of cardiovascular risk. *Diabetologia* 47:1360–1369
14. Stefan N, Schaefer S, Machicao F, Machann J, Schick F, Claussen CD, Stumvoll M, Haring HU, Fritsche A 2005 Liver fat and insulin resistance are independently associated with the  $-514C>T$  polymorphism of the hepatic lipase gene. *J Clin Endocrinol Metab* 90:4238–4243
15. Hamaguchi M, Kojima T, Takeda N, Nakagawa T, Taniguchi H, Fujii K, Omatsu T, Nakajima T, Sarui H, Shimazaki M, Kato T, Okuda J, Ida K 2005 The metabolic syndrome as a predictor of nonalcoholic fatty liver disease. *Ann Intern Med* 143:722–728
16. Kelley DE, McKolanis TM, Hegazi RA, Kuller LH, Kalhan SC 2003 Fatty liver in type 2 diabetes mellitus: relation to regional adiposity, fatty acids, and insulin resistance. *Am J Physiol Endocrinol Metab* 285:E906–E916
17. Bellentani S, Saccoccio G, Masutti F, Croce LS, Brandi G, Sasso F, Cristanini G, Tiribelli C 2000 Prevalence of and risk factors for hepatic steatosis in northern Italy. *Ann Intern Med* 132:112–117
18. Santoliquido A, Di Campli C, Miele L, Gabrieli ML, Forgione A, Zocco MA, Lupascu A, Di Giorgio A, Flore R, Pola P, Gasbarrini G, Gasbarrini A, Tondi P, Grieco A 2005 Hepatic steatosis and vascular disease. *Eur Rev Med Pharmacol Sci* 9:269–271
19. Pietilainen KH, Rissanen A, Kaprio J, Makimattila S, Hakkinen AM, Westerbacka J, Sutinen J, Vehkavaara S, Yki-Jarvinen H 2005 Acquired obesity is associated with increased liver fat, intra-abdominal fat, and insulin resistance in young adult monozygotic twins. *Am J Physiol Endocrinol Metab* 288:E768–E774
20. Thomsen C, Becker U, Winkler K, Christoffersen P, Jensen M, Henriksen O 1994 Quantification of liver fat using magnetic resonance spectroscopy. *Magn Reson Imaging* 12:487–495
21. Lukaski HC, Johnson PE, Bolonchuk WW, Lykken GI 1985 Assessment of fat-free mass using bioelectrical impedance measurements of the human body. *Am J Clin Nutr* 41:810–817
22. Sutinen J, Hakkinen AM, Westerbacka J, Seppala-Lindroos A, Vehkavaara S, Halavaara J, Jarvinen A, Ristola M, Yki-Jarvinen H 2002 Increased fat accumulation in the liver in HIV-infected patients with antiretroviral therapy-associated lipodystrophy. *AIDS* 16:2183–2193
23. Marti B, Tuomilehto J, Salomaa V, Kartovaara L, Korhonen HJ, Pietinen P 1991 Body fat distribution in the Finnish population: environmental determinants and predictive power for cardiovascular risk factor levels. *J Epidemiol Community Health* 45:131–137
24. Kadish AH, Little RL, Sternberg JC 1968 A new and rapid method for the determination of glucose by measurement of rate of oxygen consumption. *Clin Chem* 14:116–131
25. Kuzuya H, Blix PM, Horwitz DL, Steiner DF, Rubenstein AH 1977 Determination of free and total insulin and C-peptide in insulin-treated diabetics. *Diabetes* 26:22–29
26. Stenman UH, Pesonen K, Ylinen K, Huhtala ML, Teramo K 1984 Rapid chromatographic quantitation of glycosylated haemoglobins. *J Chromatogr* 297:327–332
27. Friedewald WT, Levy RI, Fredrickson DS 1972 Estimation of the concentration of low-density lipoprotein cholesterol in plasma, without use of the preparative ultracentrifuge. *Clin Chem* 18:499–502
28. Miles J, Glasscock R, Aikens J, Gerich J, Haymond M 1983 A microfluorometric method for the determination of free fatty acids in plasma. *J Lipid Res* 24:96–99
29. Szczepaniak LS, Nurenberg P, Leonard D, Browning JD, Reingold JS, Grundy S, Hobbs HH, Dobbins RL 2005 Magnetic resonance spectroscopy to measure hepatic triglyceride content: prevalence of hepatic steatosis in the general population. *Am J Physiol Endocrinol Metab* 288:E462–E468
30. Nielsen S, Guo Z, Johnson CM, Hensrud DD, Jensen MD 2004 Splanchnic lipolysis in human obesity. *J Clin Invest* 113:1582–1588
31. Nikkila EA, Taskinen MR 1978 Relation between H.D.L.-cholesterol levels and triglyceride metabolism. *Lancet* 2:892
32. Armitage P, Fox W, Rose GA, Tinker CM 1966 The variability of measurements of casual blood pressure. II. Survey experience. *Clin Sci* 30:337–344
33. Omagari K, Kadokawa Y, Masuda J, Egawa I, Sawa T, Hazama H, Ohba K, Isomoto H, Mizuta Y, Hayashida K, Murase K, Kadota T, Murata I, Kohno S 2002 Fatty liver in non-alcoholic non-overweight Japanese adults: Incidence and clinical characteristics. *J Gastroenterol Hepatol* 17:1098–1105
34. Prati D, Taioli E, Zanella A, Della Torre E, Butelli S, Del Vecchio E, Vianello L, Zanuso F, Mozzi F, Milani S, Conte D, Colombo M, Sirchia G 2002 Updated definitions of healthy ranges for serum alanine aminotransferase levels. *Ann Intern Med* 137:1–10
35. Lehti H 1971 Normal weights of human organs: a postmortem study on cases of death from external causes. Helsinki: H. Lehti; 147
36. McKenzie J, Fisher BM, Jaap AJ, Stanley A, Paterson K, Sattar N 2006 Effects of HRT on liver enzyme levels in women with type 2 diabetes: a randomized placebo-controlled trial. *Clin Endocrinol (Oxf)* 65:40–44
37. Stranges S, Dorn JM, Muti P, Freudenheim JL, Farinero E, Russell M, Nochajski TH, Trevisan M 2004 Body fat distribution, relative weight, and liver enzyme levels: a population-based study. *Hepatology* 39:754–763
38. Goto T, Onuma T, Takebe K, Kral JG 1995 The influence of fatty liver on insulin clearance and insulin resistance in non-diabetic Japanese subjects. *Int J Obes Relat Metab Disord* 19:841–845
39. Strang BD, Bertics SJ, Grummer RR, Armentano LE 1998 Relationship of triglyceride accumulation to insulin clearance and hormonal responsiveness in bovine hepatocytes. *J Dairy Sci* 81:740–747
40. Tiikkainen M, Hakkinen AM, Korshenninnikova E, Nyman T, Makimattila S, Yki-Jarvinen H 2004 Effects of rosiglitazone and metformin on liver fat content, hepatic insulin resistance, insulin clearance, and gene expression in adipose tissue in patients with type 2 diabetes. *Diabetes* 53:2169–2176
41. Polonsky KS, Rubenstein AH 1984 C-peptide as a measure of the secretion and hepatic extraction of insulin. Pitfalls and limitations. *Diabetes* 33:486–494
42. Alberti KG, Zimmet PZ 1998 Definition, diagnosis and classification of diabetes mellitus and its complications. Part 1: diagnosis and classification of diabetes mellitus provisional report of a WHO consultation. *Diabet Med* 15:539–553
